# Supplementary material
Source: PubMed Central journal article supplement (PMC3133199)

Table S1. Primers used in this study

| Primer         | Sequence (5'-3')                                                       |
|----------------|------------------------------------------------------------------------|
| Nox2F          | GACCGTAATAGCAACATGAG                                                   |
| Nox2R          | CTTGAATCGCTAAACTGAAC                                                   |
| noxE_NcoI_F    | CATGCCATGGGAAAAATCGTAGTTATCG<br>NcoI                                   |
| noxE_XbaI_R    | TGCTCTAGATCCTCCTAACTTTCTATACG<br>XbaI                                  |
| noxE_XbaI_6H_R | CTAGTCTAGATTAGTGATGGTGATGGTGATGTTTGGCATTCAAAGCTGCAAC<br>XbaI 6-His Tag |
| noxE_XhoI_R    | CCGCTCGAGTTTGGCATTCAAAGCTGCAAC<br>XhoI                                 |
| T7terRev       | GCTAGTTATTGCTCAGCGG                                                    |
| T7promRev      | TAATACGACTCACTATAGGG                                                   |
| pNZ8048_F      | GTTAGATACAATGATTTTCG                                                   |
| pNZ8048_R      | AAATTTACATTAGTCTCGG                                                    |
| noxE_A303T_F   | CGCTCTTGCCTCAAACACTGTTCCGGTCAGGAATTG                                   |
| noxE_A303T_R   | CAATTCCTGACCGAACAGTGTGGAGGCAAGAGCG                                     |
| noxE_A144T_F   | GACGCAGAATTTACCAAAGAAAAAGTAAAGCGTATCGC                                 |
| noxE_A144T_R   | GCGATACGCTTTACTTTTTCTTTGGTAAATTCTGCGTC                                 |
| noxE_K384N_F   | CGTATCGTATATGAGACAAATAGTCGCAGAATTATTGGAGC                              |
| noxE_K384N_R   | GCTCCAATAATTCTGCGACTATTTGTCTCATATACGATACG                              |
| noxE_A303G_F   | CGCTCTTGCCTCAAACGGTGTTCGGTCAGGAATTG                                    |
| noxE_A303G_R   | CAATTCCTGACCGAACACCGTTTGGAGGCAAGAGCG                                   |
| noxE_A300T_F   | ACTTATATCGCTCTTACCTCAAACGCTGTTCCGG                                     |
| noxE_A300T_R   | CCGAACAGCGTTTGAGGTAAGAGCGATATAAGT                                      |
| noxE_L299T_F   | TTTACTTATATCGCTACTGCCTCAAACGCTGTTT                                     |
| noxE_L299T_R   | GAACAGCGTTTGAGGCAGTAGCGATATAAGTAAA                                     |
| noxE_N302S_F   | ATCGCTCTTGCCTCAAACGCGCTGTTCCGGTCAGG                                    |
| noxE_N302S_R   | CCTGACCGAACAGCGCTTGAGGCAAGAGCGAT                                       |
| noxE_G307A_F   | AACGCTGTTCCGGTCAGCAATTGTCGCAGGACAC                                     |
| noxE_G307A_R   | GTGTCCTGCGACAATTGCTGACCGAACAGCGTT                                      |
| noxE_G307S_F   | AACGCTGTTCCGGTCAAGCATTGTCGCAGGACAC                                     |
| noxE_G307S_R   | GTGTCCTGCGACAAITGCTTGACCGAACAGCGTT                                     |
| noxE_T303A_F   | CGCTCTTGCCTCAAACGCTGTTCCGGTCAGGAATTG                                   |
| noxE_T303A_R   | CAATTCCTGACCGAACAGCGTTTGGAGGCAAGAGCG                                   |

Fig. S1. SDS-PAGE of the soluble fractions (SF) of *E. coli* Rosetta overexpressing WT NoxE (1), no protein (2), NoxE A303T (3), NoxE A144T (4) and NoxE K384N (5). The arrow indicates NoxE.

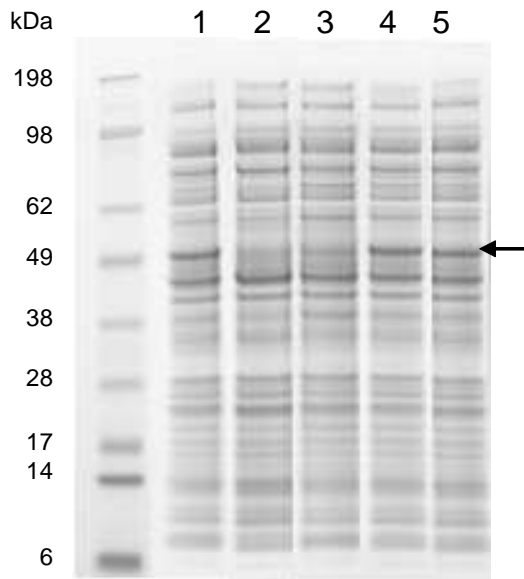

Figure S2. SDS-PAGE of purified TIL46 NoxE (WT) and the derived variants. Molecular weight (kDa) standards were seeblue® plus2 from Invitrogen; 1ug of protein was loaded in each lane; before loading purified proteins were heated at 95°C for 5 min in the presence of 5%  $\beta$ -mercaptoethanol and 2% SDS in the sample buffer; the percentage of purity estimated by image analysis with SameSpot v2.0 software is indicated in parenthesis

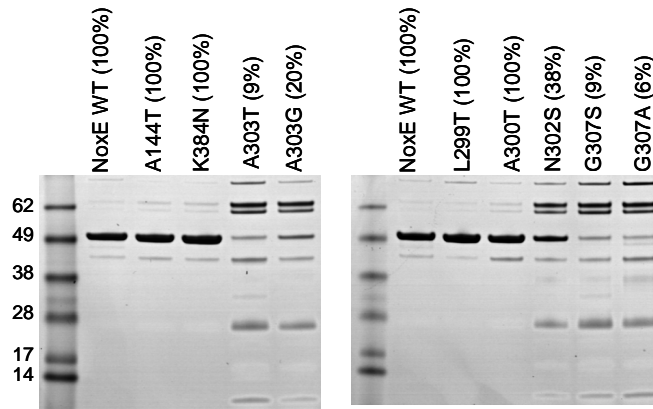

Figure S3 : Particle size distribution of purified recombinant NoxE solutions determined by dynamic light scattering. Recombinant His-tagged NoxE of *L. lactis* TIL46 and the derived variants were at a final concentration of 5  $\mu$ M in 20 mM MOPS buffer pH 7.

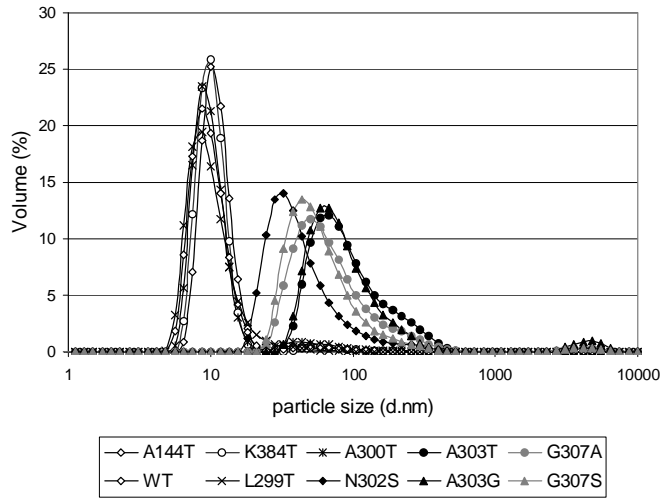

Figure S4: Circular dichroism spectra of the recombinant His-tagged NoxE of *L. lactis* TIL46 and the A303T variant in the far UV region. All measurements were in 20 mM MOPS pH 7.0

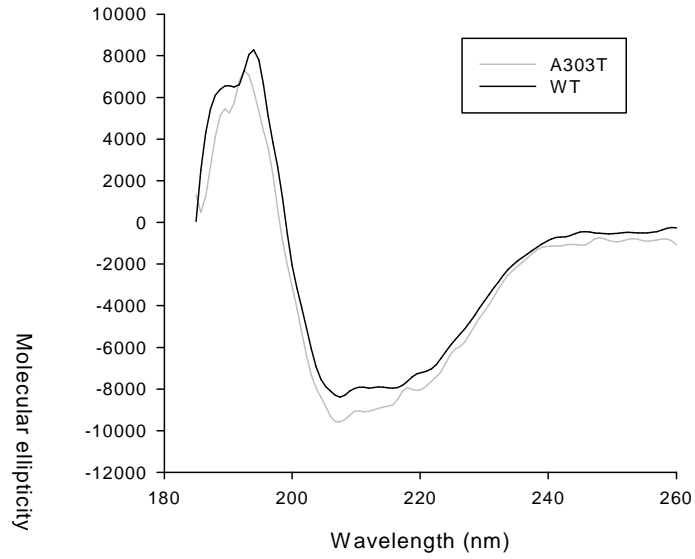

Figure S5: CLUSTAL W sequence alignment of NADH oxidases sharing from 33% to 53.8% of identity with *L. lactis* NoxE. *L. cremoris*, *Lactococcus lactis* subsp. *cremoris* MG1363 (Gene ID: 4796799); *L. lactis*, *Lactococcus lactis* subsp. *lactis* IL1403 (Gene ID: 1114002); *S. mutans* UA159, *Streptococcus mutans* (Gene ID: 1028431); *E. faecalis*, *Enterococcus faecalis* V583 (Gene ID:1200486); *Lb. san.*, *Lactobacillus sanfransiscensis* (Prot ID: BAB19268.1); *Treponema*, *Treponema denticola* (Gene ID: 2741711).

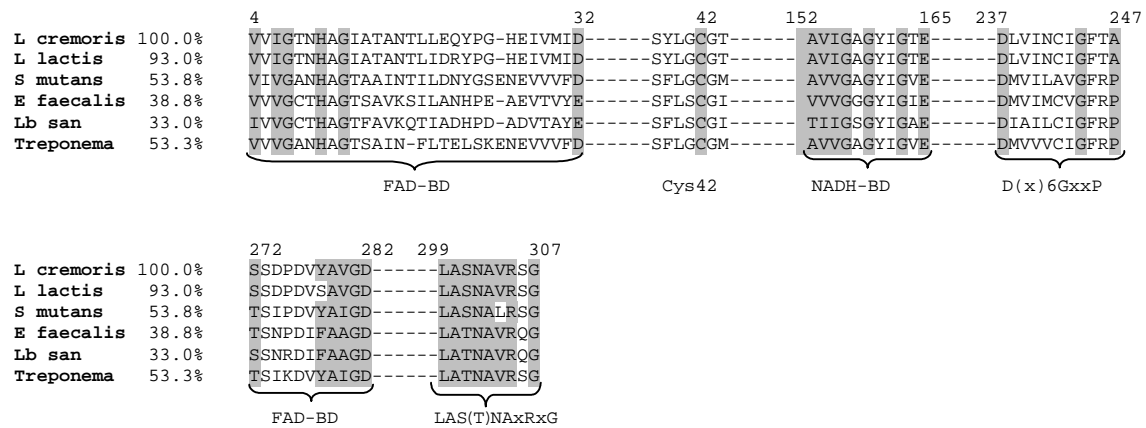

Fig. S6. Ribbon representation of the *Streptococcus pyogenes* NADH oxidase dimer (PDB code 2BC0). Subunit A is in red and subunit B is in blue. The  $\alpha$ -helix formed by residues corresponding to the 299-307 sequence of *L. lactis* NoxE (residues 309-317) is illustrated by purple VDW spheres. The FAD, shown in VDW spheres, is colored by atom type.

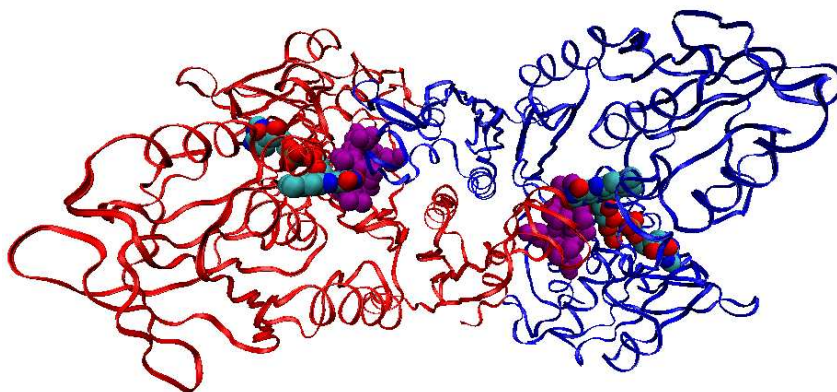

Supplement: supp_193_12_3000__1.pdf [file supp_193_12_3000__1.pdf]
